# Supplementary material for: Sex chromosome complement contributes to sex differences in coxsackievirus B3 but not influenza A virus pathogenesis
Source: Springer Nature journal article supplement (doi:10.1186/2042-6410-2-8), 2011-01-01

**A**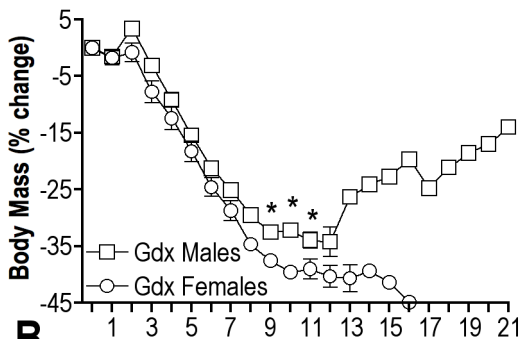**B**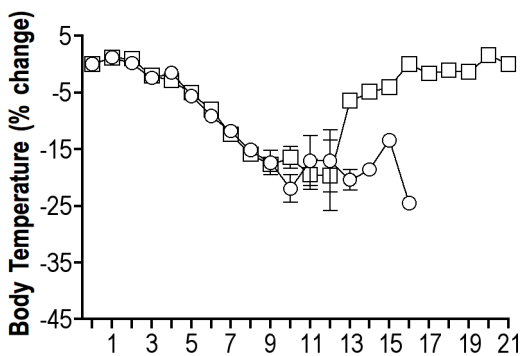**C**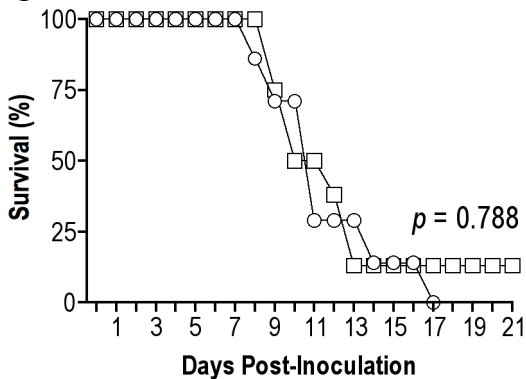

Supplement: 13293_2011_16_MOESM6_ESM.pdf [file 13293_2011_16_MOESM6_ESM.pdf]
